# Supplementary material
Source: publisher site journal article supplement (https://www.dovepress.com/get_supplementary_file.php?f=412588.xlsx)
Supplement: Supplementary file 1 [file get_supplementary_file.php]

## Sheet: 灰度值分析
Supplementary Material 1
Bcl-xL gray value result
sample	repetition	Area	Mean	Min	Max	Intden	Rawintden	mean value
1	1	2408	165.426	9	252	398346	398346	399086
	2	2380	168.305	14	252	400567	400567
	3	2408	165.426	9	252	398346	398346
2	1	2697	139.927	15	244	377384	377384	375023
	2	2580	143.977	15	244	371461	371461
	3	2548	147.655	15	244	376224	376224
3	1	2492	139.648	11	235	348004	348004	349023
	2	2697	130.138	11	235	350983	350983
	3	2581	134.864	11	235	348083	348083
4	1	1955	138.597	18	238	270958	270958	270690
	2	1992	136.532	19	238	271971	271971
	3	1909	140.985	20	238	269141	269141
5	1	1660	159.376	20	248	264564	264564	267848
	2	1804	149.665	18	248	269996	269996
	3	1782	150.946	18	248	268985	268985
6	1	1743	165.482	11	253	288435	288435	288252
	2	1743	165.482	11	253	288435	288435
	3	1722	167.181	18	253	287886	287886
Cleaved Caspase-3 gray value result
sample	repetition	Area	Mean	Min	Max	Intden	Rawintden	mean value
1	1	1496	48.239	2	119	72165	72165	72539
	2	1564	46.475	1	119	72687	72687
	3	1541	47.219	1	119	72765	72765
2	1	1650	41.705	3	114	68813	68813	68630.7
	2	1584	43.057	3	114	68202	68202
	3	1680	40.998	3	114	68877	68877
3	1	1650	52.625	4	165	86831	86831	87268.7
	2	1725	50.747	2	165	87539	87539
	3	1716	50.953	2	165	87436	87436
4	1	2072	109.481	5	238	226845	226845	228042
	2	2204	104.077	5	238	229386	229386
	3	2128	107.093	7	238	227894	227894
5	1	1950	126.974	7	244	247599	247599	250263
	2	2072	121.128	9	244	250978	250978
	3	2128	118.52	9	244	252211	252211
6	1	2400	97.846	2	253	234831	234831	235337
	2	2475	95.305	2	253	235879	235879
	3	2409	97.675	4	253	235300	235300
β-actin gray value result
sample	repetition	Area	Mean	Min	Max	Intden	Rawintden	mean value
1	1	2688	128.47	5	246	345327	345327	346283
	2	2856	122.231	5	246	349093	349093
	3	2688	128.135	5	246	344428	344428
2	1	2520	120.032	8	234	302480	302480	302940
	2	2520	119.776	9	234	301835	301835
	3	2624	116.046	8	234	304506	304506
3	1	2560	109.443	7	231	280174	280174	280317
	2	2560	109.494	7	231	280305	280305
	3	2560	109.559	7	231	280472	280472
4	1	2496	120.85	9	232	301641	301641	301958
	2	2560	118.605	8	232	303628	303628
	3	2496	120.435	8	232	300605	300605
5	1	2296	142.332	12	239	326794	326794	327037
	2	2340	140.778	12	239	329421	329421
	3	2240	145.043	12	239	324896	324896
6	1	2296	146.931	6	252	337353	337353	335629
	2	2352	143.827	5	252	338281	338281
	3	2132	155.372	7	252	331254	331254
p-IRE1α gray value result
sample	repetition	Area	Mean	Min	Max	Intden	Rawintden	mean value
1	1	1971	117.542	3	244	231676	231676	231167
	2	1971	117.576	3	244	231742	231742
	3	1863	123.501	4	244	230082	230082
2	1	1725	136.47	14	233	235410	235410	235365
	2	1700	138.076	16	233	234729	234729
	3	1742	135.452	14	233	235957	235957
3	1	1988	128.697	8	226	255849	255849	254042
	2	1904	132.951	8	226	253139	253139
	3	1904	132.951	8	226	253139	253139
4	1	2940	109.177	6	225	320979	320979	320841
	2	3081	103.905	1	225	320130	320130
	3	3040	105.728	2	225	321413	321413
5	1	3655	99.676	4	235	364317	364317	363978
	2	3634	99.781	2	235	362605	362605
	3	3772	96.769	2	235	365011	365011
6	1	3200	105.261	1	251	336834	336834	336944
	2	3157	106.084	1	251	334906	334906
	3	3354	101.101	0	251	339092	339092
IRE1α gray value result
sample	repetition	Area	Mean	Min	Max	Intden	Rawintden	mean value
1	1	2496	119.161	2	246	297427	297427	296070
	2	2400	123.547	2	246	296513	296513
	3	2340	125.757	2	246	294271	294271
2	1	2700	108.257	5	238	292295	292295	292369
	2	2880	101.753	1	238	293049	293049
	3	2816	103.609	3	238	291762	291762
3	1	2408	105.12	5	235	253130	253130	254834
	2	2464	103.218	5	235	254328	254328
	3	2576	99.785	5	235	257045	257045
4	1	2700	100.539	6	238	271456	271456	273736
	2	2992	91.448	5	238	273612	273612
	3	3240	85.229	2	238	276141	276141
5	1	3168	94.177	0	244	298354	298354	297804
	2	2992	99.629	5	244	298091	298091
	3	2880	103.114	2	244	296967	296967
6	1	2856	101.337	0	254	289418	289418	289594
	2	2856	101.074	0	254	288668	288668
	3	2880	100.936	0	254	290696	290696
β-actin gray value result
sample	repetition	Area	Mean	Min	Max	Intden	Rawintden	mean value
1	1	2460	133.54	6	247	328509	328509	328988
	2	2520	130.848	2	247	329738	329738
	3	2520	130.443	3	247	328717	328717
2	1	2640	114.812	5	238	303103	303103	301378
	2	2511	119.592	3	238	300296	300296
	3	2542	118.306	7	238	300734	300734
3	1	2656	122.932	11	232	326508	326508	327163
	2	2550	127.626	13	232	325446	325446
	3	2720	121.153	11	232	329535	329535
4	1	2739	114.85	10	237	314575	314575	314073
	2	2673	116.556	10	237	311554	311554
	3	2822	112.009	9	237	316089	316089
5	1	2542	127.239	9	243	323442	323442	323024
	2	2511	128.632	12	243	322994	322994
	3	2511	128.489	13	243	322636	322636
6	1	2408	139.503	7	252	335924	335924	335558
	2	2322	143.603	8	252	333446	333446
	3	2436	138.466	6	252	337304	337304
GRP78 gray value result
sample	repetition	Area	Mean	Min	Max	Intden	Rawintden	mean value
1	1	1488	68.806	7	185	102383	102383	104161
	2	1716	61.471	1	185	105484	105484
	3	1664	62.87	1	185	104616	104616
2	1	1632	65.874	3	186	107507	107507	106750
	2	1452	72.578	4	186	105383	105383
	3	1536	69.896	5	186	107360	107360
3	1	1716	81.269	4	226	139457	139457	137985
	2	1632	84.95	2	226	138639	138639
	3	1452	93.567	6	226	135860	135860
4	1	2496	93.127	6	237	232444	232444	231142
	2	2432	94.968	6	237	230961	230961
	3	2432	94.581	2	237	230022	230022
5	1	2016	119.451	9	244	240814	240814	243597
	2	2220	110.882	9	244	246158	246158
	3	2128	114.577	9	244	243819	243819
6	1	2280	118.032	7	252	269113	269113	267898
	2	2280	118.032	7	252	269113	269113
	3	2128	124.75	9	252	265469	265469
β-actin gray value result
sample	repetition	Area	Mean	Min	Max	Intden	Rawintden	mean value
1	1	2464	141.107	12	247	347688	347688	345366
	2	2340	146.088	12	247	341845	341845
	3	2408	143.922	18	247	346565	346565
2	1	2640	125.745	19	237	331968	331968	334204
	2	2924	115.91	11	237	338921	338921
	3	2688	123.409	14	237	331723	331723
3	1	2640	134.157	20	228	354175	354175	351977
	2	2580	136.002	22	228	350885	350885
	3	2580	135.996	20	228	350870	350870
4	1	2580	130.729	21	230	337280	337280	336436
	2	2520	132.687	16	230	334371	334371
	3	2580	130.875	16	230	337658	337658
5	1	2296	139.461	19	237	320203	320203	321304
	2	2352	136.843	15	237	321855	321855
	3	2352	136.843	15	237	321855	321855
6	1	2816	129.806	7	247	365535	365535	364171
	2	2752	132.542	6	247	364756	364756
	3	2688	134.755	8	247	362222	362222
CHOP gray value result
sample	repetition	Area	Mean	Min	Max	Intden	Rawintden	mean value
1	1	2511	83.002	0	240	208417	208417	207044
	2	2340	88.307	1	240	206639	206639
	3	2310	89.21	1	240	206076	206076
2	1	2508	76.679	0	231	192311	192311	192193
	2	2430	78.939	1	231	191821	191821
	3	2480	77.6	0	231	192447	192447
3	1	3840	45.115	0	226	173242	173242	174058
	2	4320	40.622	0	226	175489	175489
	3	3996	43.404	0	226	173442	173442
4	1	3486	73.373	0	227	255778	255778	256516
	2	3772	68.032	0	227	256615	256615
	3	4018	64	0	227	257154	257154
5	1	3871	69.579	0	234	269340	269340	267975
	2	3634	73.627	0	234	267561	267561
	3	3403	78.467	0	234	267023	267023
6	1	2573	122.077	0	247	314103	314103	315546
	2	2592	121.791	0	247	315683	315683
	3	2640	120.019	3	247	316851	316851
β-actin gray value result
sample	repetition	Area	Mean	Min	Max	Intden	Rawintden	mean value
1	1	3010	130.337	6	249	392314	392314	393686
	2	3045	128.792	5	249	392171	392171
	3	3268	121.351	4	249	396574	396574
2	1	3268	107.876	4	237	352539	352539	354942
	2	3382	106.178	4	237	359094	359094
	3	3145	112.303	11	237	353194	353194
3	1	3526	97.759	4	229	344699	344699	344636
	2	3564	96.223	2	229	342937	342937
	3	3792	91.317	1	229	346273	346273
4	1	3652	93.868	2	231	342807	342807	343969
	2	3726	92.019	3	231	342864	342864
	3	4018	86.171	2	231	346235	346235
5	1	3354	102.321	4	236	343185	343185	345010
	2	3792	92.109	2	236	349279	349279
	3	3240	105.73	4	236	342566	342566
6	1	3913	101.556	0	249	397388	397388	393835
	2	3608	108.775	0	249	392460	392460
	3	3731	104.974	0	249	391658	391658
p-PERK gray value result
sample	repetition	Area	Mean	Min	Max	Intden	Rawintden	mean value
1	1	1960	93.541	2	242	183341	183341	183393
	2	1924	95.124	4	242	183018	183018
	3	2016	91.181	2	242	183821	183821
2	1	2220	79.076	5	233	175548	175548	176733
	2	2432	73.343	5	233	178371	178371
	3	2240	78.696	5	233	176279	176279
3	1	2220	85.473	4	229	189751	189751	186510
	2	2016	92.2	5	229	185875	185875
	3	1904	96.589	5	229	183905	183905
4	1	2856	91.209	0	229	260493	260493	258275
	2	2541	100.978	1	229	256586	256586
	3	2625	98.189	4	229	257747	257747
5	1	2574	98.018	5	239	252299	252299	251761
	2	2432	102.804	6	239	250019	250019
	3	2574	98.277	7	239	252965	252965
6	1	2490	111.618	3	251	277929	277929	276204
	2	2320	118.399	3	251	274686	274686
	3	2340	117.948	6	251	275998	275998
PERK gray value result
sample	repetition	Area	Mean	Min	Max	Intden	Rawintden	mean value
1	1	2436	126.655	7	255	308531	308531	308858
	2	2430	127.372	8	255	309513	309513
	3	2436	126.655	7	255	308531	308531
2	1	2175	138.595	25	255	301445	301445	301209
	2	2212	136.48	21	255	301894	301894
	3	2146	139.929	23	255	300288	300288
3	1	2475	124.102	30	255	307153	307153	306229
	2	2418	125.763	30	255	304096	304096
	3	2475	124.217	30	255	307438	307438
4	1	2100	146.953	24	255	308601	308601	308460
	2	2100	146.953	24	255	308601	308601
	3	2100	146.751	24	255	308178	308178
5	1	2106	143.268	14	255	301722	301722	305032
	2	2156	141.765	20	255	305646	305646
	3	2240	137.378	13	255	307727	307727
6	1	2080	151.338	5	255	314782	314782	313669
	2	2025	153.577	5	255	310993	310993
	3	2106	149.683	7	255	315233	315233
β-actin gray value result
sample	repetition	Area	Mean	Min	Max	Intden	Rawintden	mean value
1	1	2800	133.323	4	243	373304	373304	375948
	2	2812	134.094	4	243	377072	377072
	3	2886	130.792	4	243	377467	377467
2	1	2368	140.111	9	231	331784	331784	336078
	2	2520	134.126	10	231	337997	337997
	3	2555	132.467	9	231	338452	338452
3	1	2555	129.441	11	225	330721	330721	331455
	2	2574	128.934	11	225	331876	331876
	3	2574	128.892	12	225	331767	331767
4	1	2618	135.102	11	227	353697	353697	352867
	2	2550	137.734	13	227	351222	351222
	3	2640	133.97	11	227	353682	353682
5	1	2664	141.187	11	234	376121	376121	374206
	2	2652	141.375	12	234	374926	374926
	3	2574	144.356	12	234	371572	371572
6	1	2418	146.766	4	247	354880	354880	356110
	2	2430	146.557	7	247	356134	356134
	3	2449	145.903	5	247	357316	357316
p-elF2α gray value result
sample	repetition	Area	Mean	Min	Max	Intden	Rawintden	mean value
1	1	1972	114.721	7	247	226230	226230	226060
	2	1863	119.636	8	247	222882	222882
	3	2130	107.544	7	247	229069	229069
2	1	1932	118.053	8	235	228079	228079	224260
	2	1794	124.559	10	235	223459	223459
	3	1690	130.912	10	235	221241	221241
3	1	1846	130.579	11	229	241049	241049	242249
	2	1932	126.725	11	229	244832	244832
	3	1846	130.48	13	229	240867	240867
4	1	2765	124.338	12	231	343794	343794	344038
	2	2652	128.791	13	231	341553	341553
	3	2822	122.88	10	231	346767	346767
5	1	2640	130.743	12	238	345162	345162	344231
	2	2618	131.71	12	238	344816	344816
	3	2574	133.145	14	238	342715	342715
6	1	2574	129.982	11	251	334574	334574	335118
	2	2695	125.516	9	251	338266	338266
	3	2574	129.181	6	251	332513	332513
elF2α gray value result
sample	repetition	Area	Mean	Min	Max	Intden	Rawintden	mean value
1	1	2997	103.478	4	248	310125	310125	310873
	2	3042	102.233	3	248	310993	310993
	3	3145	99.046	3	248	311500	311500
2	1	2886	101.773	5	237	293716	293716	296628
	2	3116	95.68	4	237	298139	298139
	3	3120	95.522	5	237	298030	298030
3	1	2850	96.857	5	233	276042	276042	278250
	2	3040	91.943	4	233	279507	279507
	3	3034	92.024	5	233	279202	279202
4	1	3192	94.384	3	234	301273	301273	301571
	2	3160	95.427	4	234	301548	301548
	3	3318	90.986	1	234	301893	301893
5	1	2774	99.726	5	242	276639	276639	276979
	2	2808	98.775	2	242	277360	277360
	3	2812	98.484	4	242	276938	276938
6	1	3120	96.003	3	251	299529	299529	297821
	2	2993	99.417	3	251	297555	297555
	3	2964	99.993	2	251	296380	296380
β-actin gray value result
sample	repetition	Area	Mean	Min	Max	Intden	Rawintden	mean value
1	1	3528	121.577	11	244	428925	428925	424673
	2	3458	122.665	7	244	424176	424176
	3	3276	128.485	8	244	420918	420918
2	1	3154	127.161	14	236	401066	401066	401034
	2	3154	127.343	14	236	401639	401639
	3	3276	122.221	7	236	400397	400397
3	1	3956	102.653	5	230	406096	406096	402792
	2	3741	107.584	10	230	402472	402472
	3	3655	109.387	11	230	399809	399809
4	1	3655	108.091	6	232	395073	395073	396607
	2	3740	106.075	6	232	396719	396719
	3	3825	104.06	5	232	398030	398030
5	1	3760	102.897	4	238	386891	386891	384323
	2	3744	102.764	3	238	384747	384747
	3	3440	110.852	4	238	381332	381332
6	1	3526	112.925	0	251	398172	398172	399596
	2	3567	112.013	0	251	399550	399550
	3	3402	117.891	4	251	401066	401066
